# Supplementary material
Source: HighWire-hosted journal article supplement (https://fg.bmj.com/highwire/filestream/142620/field_highwire_adjunct_files/0/flgastro-2020-101713supp001_data_supplement.pdf)
Supplement: flgastro-2020-101713supp001_data_supplement.pdf [file flgastro-2020-101713supp001_data_supplement.pdf]

## SUPPLEMENTARY MATERIAL

### Manuscript Title: Widespread Gaps in the Quality of Care for Primary Biliary Cholangitis in the United Kingdom

**Authors:** Mathuri Sivakumar<sup>1</sup>, Akash Gandhi<sup>2</sup>, Eathar Shakweh<sup>3</sup>, Yu Meng Li<sup>3</sup>, Niloufar Safinia<sup>3</sup>, Belinda Smith<sup>3</sup>, Aileen Marshall<sup>4</sup>, Lucy Turner<sup>5</sup>, Ashis Mukhopadhy<sup>6</sup>, Hasan Haboubi<sup>7</sup>, Rebecca Vincent<sup>7</sup>, Huey Tan<sup>8</sup>, Laith Alrubaiy<sup>1,2</sup>, David Jones<sup>9,10</sup>.

#### Affiliations:

1. Imperial College School of Medicine, Imperial College London, London, UK
2. St Mark's Hospital and Academic Institute, London, UK
3. Imperial College Healthcare NHS Trust, London, UK
4. Royal Free London NHS Foundation Trust, London UK
5. York Teaching Hospital NHS Foundation Trust, York, UK
6. Aberdeen Royal Infirmary, Aberdeen, UK
7. Cardiff and Vale University Health Board, Cardiff, UK
8. University Hospital of Derby and Burton NHS Foundation Trust, Derby, UK
9. Newcastle-upon-Tyne Hospitals NHS Foundation Trust, Newcastle, UK
10. Newcastle University, Newcastle, UK

#### Authorship Footnotes:

- Mathuri Sivakumar<sup>1</sup> and Akash Gandhi<sup>2</sup> should be considered joint first author.
- Laith Alrubaiy<sup>1,2</sup> and David Jones<sup>9,10</sup> should be considered joint senior author.
- Huey Tan's<sup>8</sup> current institution is University Hospitals Plymouth NHS Trust, Plymouth, UK.
- Mathuri Sivakumar's<sup>1</sup> current institution is University of Birmingham College of Medical and Dental Sciences, Birmingham, UK

**KEYWORDS:** Standards; Liver Cirrhosis, Biliary; Liver Diseases; Hepatitis, Autoimmune; Guideline; Ursodeoxycholic Acid.

## CONTENTS

### **Page 3 PBC Audit Proforma**

### **Page 5 Raw Data and Statistical Analyses: England, Wales and Scotland**

- Supplementary Table 1

### **Page 6 Raw Data and Statistical Analyses: DHC and GGC**

- Supplementary Table 2

### **Page 7 Supplementary Data Collection**

- Methods (**page 7**)
- UDCA Treatment Response (Supplementary Figure 1) (**page 8**)
- Supplementary Patient Data (Supplementary Table 3) (**page 9**)
- Screening for Cirrhotic Complications (Supplementary Figure 2) (**page 10**)

### **Page 12 PBC Review Tool**

### **Page 15 References**

**PBC AUDIT PROFORMA**

The 2-page supporting proforma provided to hospitals for data collection.

## PBC Audit

|                           |           |                   |   |
|---------------------------|-----------|-------------------|---|
| Patient #                 |           | Age               |   |
| M/F                       | Weight kg | Year of Diagnosis |   |
| Date patient last weighed |           | /                 | / |

  

|                                                                                                                                    | Y    | N         |
|------------------------------------------------------------------------------------------------------------------------------------|------|-----------|
| <b>1. Clinical diagnosis:</b>                                                                                                      |      |           |
| Accurate diagnosis with $\geq 2$ of diagnostic criteria (ANA/AMA > 1 in 40, cholestatic LFTs, consistent histology)?               |      |           |
| <b>2. Treatment:</b>                                                                                                               |      |           |
| a. Is there ongoing treatment with Ursodeoxycholic Acid 13-15mg/kg/day?<br>[If YES go to question 'f', if NO go to question 'b']   |      |           |
| b. Is there treatment with Ursodeoxycholic Acid at an alternative dose?<br>[If YES go to question 'f' if NO go to question 'c']    |      |           |
| c. Is the patient on UDCA at an unspecified dose?<br>[If YES go to question 'f', if NO go to question 'd']                         |      |           |
| d. Has the patient had treatment with UDCA and discontinued?<br>[If YES please give the reason if known, if NO go to question 'e'] |      |           |
| e. The patient has no recorded treatment with UDCA?<br>[If YES go to question 'f']                                                 |      |           |
| f. Is there a record of assessing response at 1 year? (ALP < 1.67 ULN)                                                             | Full | Part      |
|                                                                                                                                    | None | No record |
| <b>3. In the past 12 months, record of presence/absence of:</b>                                                                    |      |           |
| a. Pruritus?                                                                                                                       |      |           |
| b. Fatigue?                                                                                                                        |      |           |

## PBC Audit

|                                                                                                               | Y | N |
|---------------------------------------------------------------------------------------------------------------|---|---|
| <b>4. Bone density:</b>                                                                                       |   |   |
| a. Assessment within the last 5 years                                                                         |   |   |
| <input type="text"/>                                                                                          |   |   |
| b. If abnormal ( $T \leq -2.5$ ), record of appropriate action plan in notes?                                 |   |   |
| <input type="text"/>                                                                                          |   |   |
| <b>5. Is patient high risk? Defined as bilirubin &gt; 50 <math>\mu\text{mol/L}</math> OR dropping albumin</b> |   |   |
| <input type="text"/>                                                                                          |   |   |
| OR patient is decompensating (variceal bleed, ascites or encephalopathy?)                                     |   |   |
| <b>6. If high risk, has patient been considered for transplant in the past 3 months?</b>                      |   |   |
| <input type="text"/>                                                                                          |   |   |
| <b>7. If cirrhotic, record of screening for:</b>                                                              |   |   |
| a. HCC within the last year? (or offered and patient declined)                                                |   |   |
| <input type="text"/>                                                                                          |   |   |
| b. Varices within the last year? (or offered and patient declined)                                            |   |   |
| <input type="text"/>                                                                                          |   |   |
| c. If No: Is there record of varices screening in the last 2 years?                                           |   |   |
| <input type="text"/>                                                                                          |   |   |
| <b>8. If co-existing Autoimmune Hepatitis, record of diagnostic biopsy?</b>                                   |   |   |
| <input type="text"/>                                                                                          |   |   |

Supported as a service to medicine by Dr Falk Pharma UK Ltd.

Date of preparation: March 2018 DrF 18/069

**Supplementary Table 1. Summary of the performance in England, Wales and Scotland.**

| Standard                                                                   | Target (%) | Number of patients treated according to guidelines/total number patients <sup>†</sup> (%) |               |               | p-value |
|----------------------------------------------------------------------------|------------|-------------------------------------------------------------------------------------------|---------------|---------------|---------|
|                                                                            |            | England                                                                                   | Wales         | Scotland      |         |
| Prescription of the recommended UCDA dose of 13-15mg/kg daily              | 90         | 164/277 (59.2)                                                                            | 97/218 (44.5) | 31/110 (28.2) | <0.0001 |
| Assessment of biochemical response to UDCA following one year of treatment | 80         | 243/277 (87.7)                                                                            | 86/218 (62.8) | 83/110 (75.5) | <0.0001 |
| Recorded symptom assessment of pruritus                                    | 90         | 108/293 (36.9)                                                                            | 66/181 (36.5) | 35/118 (29.7) | 0.3566  |
| Recorded symptom assessment of fatigue                                     | 90         | 74/293 (25.3)                                                                             | 65/181 (35.9) | 32/118 (27.1) | 0.0406  |
| Assessment of bone density within five years of diagnosis                  | 80         | 217/326 (66.6)                                                                            | 79/178 (44.4) | 62/117 (53.0) | <0.0001 |
| Assessment of liver transplant eligibility in high risk patients           | 90         | 25/39 (64.1)                                                                              | 5/13 (38.5)   | 9/9 (100.0)   | 0.0127  |

**Footnotes:**

<sup>†</sup> Total number of patients where data was available.

**Supplementary Table 2. Summary of the performance in hospitals with general gastroenterology clinics and hospitals with dedicated hepatology clinics.**

| Standard                                                                   | Target (%) | Number of patients treated according to guidelines/total number of patients <sup>†</sup> (%) |                | p-value <sup>‡</sup> |
|----------------------------------------------------------------------------|------------|----------------------------------------------------------------------------------------------|----------------|----------------------|
|                                                                            |            | GGC Centres                                                                                  | DHC Centres    |                      |
| Prescription of the recommended UCDA dose of 13-15mg/kg daily              | 90         | 17/45 (37.8)                                                                                 | 275/560 (49.1) | 0.1640               |
| Assessment of biochemical response to UDCA following one year of treatment | 80         | 38/45 (84.4)                                                                                 | 374/479 (78.1) | 0.4461               |
| Recorded symptom assessment of pruritus                                    | 90         | 19/57 (33.3)                                                                                 | 190/535 (35.5) | 0.7731               |
| Recorded symptom assessment of fatigue                                     | 90         | 37/139 (36.8)                                                                                | 176/535 (32.9) | 0.5565               |
| Assessment of bone density within five years of diagnosis                  | 80         | 22/55 (40.0)                                                                                 | 336/566 (59.4) | 0.0065               |
| Assessment of liver transplant eligibility in high risk patients           | 90         | 3/10 (30.0)                                                                                  | 36/51 (70.6)   | 0.0272               |

**Footnotes:**

GGC: general gastroenterology clinic, DHC: dedicated hepatology clinic.

<sup>†</sup>Total number of patients where data was available.

<sup>‡</sup>Fisher's exact test was used to test independence between secondary and tertiary centres.

## SUPPLEMENTARY DATA COLLECTION

### Methods

Supplementary data collection was optional and varied between hospitals according to the decision of the local audit lead. Additional data collection included the presence of steatosis, obeticholic acid (OCA) prescription, autoantibody status, biochemical profile at one year of UDCA treatment, transient elastography, and records of the following: oesophago-gastro-duodenoscopy (OGD) for varices screening and abdominal ultrasound for HCC screening. Supplementary data was used for further descriptive analysis and to assess UDCA response according to established criteria where possible.[1,2]

Sub-analyses were undertaken on supplementary data provided by York, London North West, Royal Free London and Imperial College NHS Trusts as they provided further data on the biochemical profile of patients. Determination of UDCA response status following one year of treatment was undertaken for each applicable patient according to the two sets of following criteria: Barcelona criteria, defined as decrease in ALP  $\leq 40\%$  and ALP  $\geq 1 \times$  upper limit of normal (ULN); and Toronto criteria, defined as ALP  $\leq 1.67 \times$  ULN.[1,3,4] Pearson's correlation coefficient (r) was calculated to assess the correlation between proportion of patients on correct UDCA dosing with the proportion of patients demonstrating a) UDCA response according to Barcelona criteria and b) UDCA response according to Toronto criteria.

### UDCA Treatment Response

The percentages of patients classified as demonstrating UDCA response according to the Barcelona criteria were 65.9% (Hospital 2), 50.0% (Hospital 4), 56.1% (Hospital 5) and 52.5% (Hospital 6). No significant correlation was observed between the percentage of patients prescribed the correct UDCA dose and the percentage of patients demonstrating UDCA response ( $p=0.4678$ ) (**Supplementary Figure 1**).

In the same four sites, percentages of patients classified as demonstrating UDCA response according to the Toronto criteria were 75.5% (Hospital 2), 82.4% (Hospital 4), 74.4% (Hospital 5) and 77.4% (Hospital 6). No significant correlation was observed between the percentage of patients prescribed the correct UDCA dose and the percentage of patients demonstrating UDCA response ( $p=0.3147$ )

(**Supplementary Figure 1**).

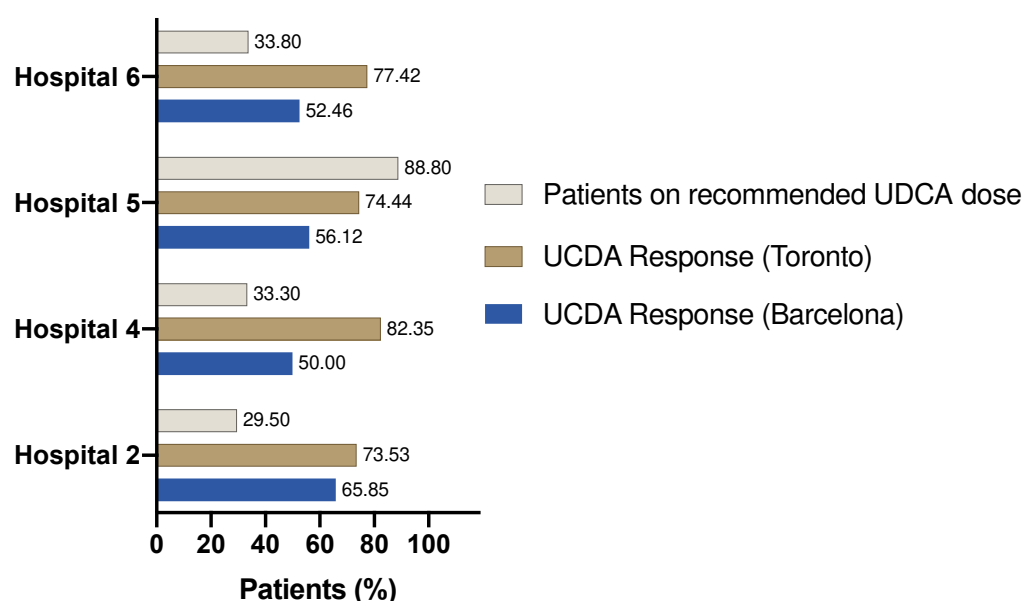

**Supplementary Figure 1.** Bar chart showing the percentages of PBC patients classified with UDCA treatment response according to Barcelona criteria and Toronto criteria. Percentages of patients on the recommended UDCA dose are shown for comparison. Four hospitals provided the necessary data on ALP profile for this analysis, as displayed on the y-axis.



### Interpretation of UDCA Treatment Response

Although we expected to observe a significant relationship between the percentage of patients prescribed the appropriate UDCA dose and the percentage of patients exhibiting treatment response, as suggested by guidelines and existing literature[1,5,6] – we did not observe a statistically significant relationship. Our analysis of the UDCA treatment response was mostly based on ALP due to the limited collection of biochemical test results and our inability to use other criteria, such as Paris-I or Rotterdam.[1] Interestingly, the observed biochemical response, according to the Toronto criteria, was slightly higher than that measured using the Barcelona criteria. Prospective research is needed to validate the different biochemical response criteria in PBC patients.

### Supplementary Table 3. Supplementary Patient Data

Additional descriptive data obtained from York, London North West, Royal Free and Imperial College NHS Trusts is presented.

| Trust<br>(number<br>of PBC<br>patients) | % of patients with<br>positive<br>antibody titre (number) |                         |              | % of<br>patients<br>currently<br>prescribed<br>obeticholic<br>acid<br>(number) | % of patients<br>who<br>underwent<br>liver<br>elastography<br>(number) | % of<br>patients<br>with<br>steatosis<br>(number) | Mean<br>MELD<br>of<br>cirrhotic<br>patients<br>(SD) | Mean<br>UKELD<br>of<br>cirrhotic<br>patients<br>(SD) |
|-----------------------------------------|-----------------------------------------------------------|-------------------------|--------------|--------------------------------------------------------------------------------|------------------------------------------------------------------------|---------------------------------------------------|-----------------------------------------------------|------------------------------------------------------|
|                                         | AMA                                                       | PBC-<br>specific<br>ANA | ASMA         |                                                                                |                                                                        |                                                   |                                                     |                                                      |
| <b>Hospital<br/>2 (75)</b>              | -                                                         | -                       | -            | 13.33%<br>(10)                                                                 | 46.67% (35)                                                            | -                                                 | -                                                   | -                                                    |
| <b>Hospital<br/>4 (19)</b>              | 100%<br>(19)                                              | 42.11%<br>(8)           | 5.26%<br>(1) | 0% (0)                                                                         | 73.68% (14)                                                            | 31.58%<br>(6)                                     | 7 (1)                                               | 48.33<br>(3.215)                                     |
| <b>Hospital<br/>5 (166)</b>             | 90%<br>(149)                                              | 36.14%<br>(60)          | 4.22%<br>(7) | 2.41% (4)                                                                      | 86.75% (144)                                                           | 7.23%<br>(12)                                     | 7.31<br>(1.545)                                     | 45.67<br>(3.617)                                     |
| <b>Hospital<br/>6 (69)</b>              | 78%<br>(54)                                               | 30.43%<br>(21)          | -            | 1.45% (1)                                                                      | -                                                                      | -                                                 | -                                                   | -                                                    |

### Screening for Cirrhotic Complications

Data on cirrhotic patients was available from six hospitals. Across the six hospitals, 138 of 483 (28.6%) patients were diagnosed with cirrhosis. Variceal screening was undertaken on 63 of 138 (45.7%) patients. There was significant variation observed between hospitals in proportions of cirrhotic patients screened for varices, ranging from 0% (Hospital 4) to 80% (Hospital 7) ( $p < 0.0001$ ) (**Supplementary Figure 2A**).

Data on HCC screening was available in five hospitals, consisting of 93 cirrhotic patients. HCC screening was undertaken on 68 of 93 (73.1%) patients with no significant variation observed between hospitals. Proportions of cirrhotic patients screened for HCC ranged from 56% (Hospital 11) to 100% (multiple hospitals) ( $p = 0.1256$ ) (**Supplementary Figure 2B**).

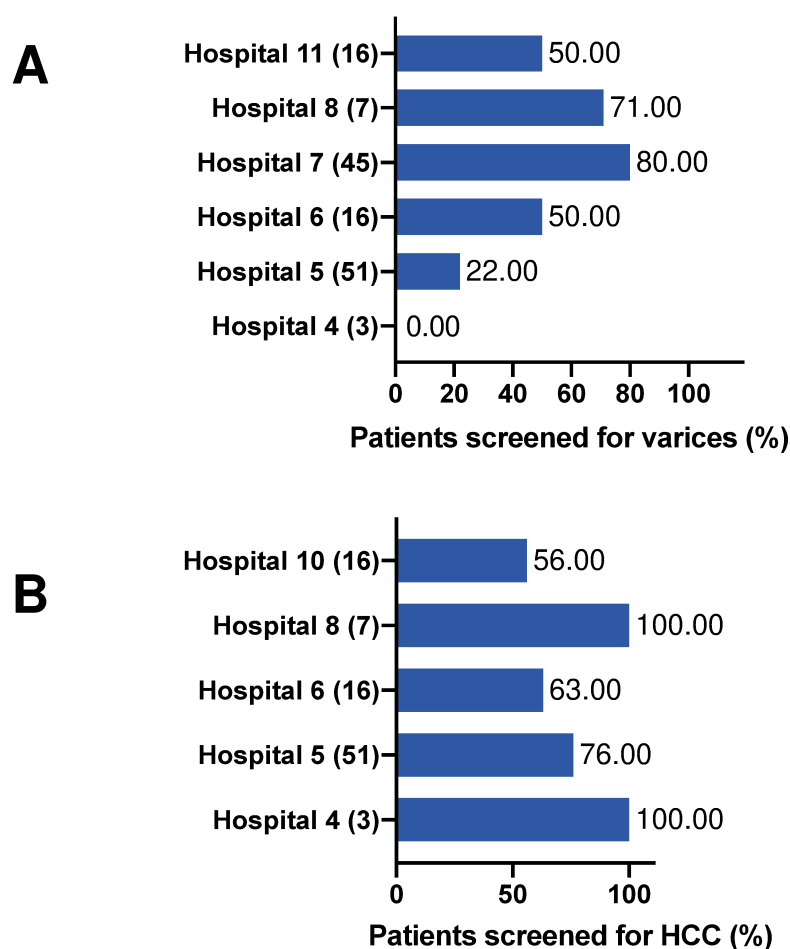**Supplementary Figure 2. Screening for Cirrhotic Complications**

**(A)** Bar chart showing the percentages of cirrhotic patients undergoing screening for varices. Data was available from six hospitals, as displayed on the y-axis. The number of patients with cirrhosis are shown in brackets for individual hospitals.

**(B)** Bar chart showing the percentages of cirrhotic patients undergoing screening for HCC. Data was available from five hospitals, as displayed on the y-axis. The number of patients with cirrhosis are shown in brackets for individual hospitals.

## PBC REVIEW TOOL

The proposed 3-page PBC Review tool. Pages 1 and 2 contain questions based on EASL and BSG/UK-PBC guidelines. Page 3 contains the PBC-10 screening questionnaire.

PBC Review

MRN sticker

**Patient:** \_\_\_\_\_

**Signed:** \_\_\_\_\_

**Date:** \_\_\_\_\_

|                                                                                           |                   |                                                                 |                              |
|-------------------------------------------------------------------------------------------|-------------------|-----------------------------------------------------------------|------------------------------|
| <b>Clinical diagnosis:</b>                                                                | Year of diagnosis | Year of biopsy (or n/a)                                         |                              |
| Cholestatic LFTs                                                                          | AMA/ANA (titre)   | Histology                                                       |                              |
| <b>Treatment:</b>                                                                         | Weight            |                                                                 | kg                           |
| 1. Ursodeoxycholic Acid                                                                   | mg/day            | mg/kg/day                                                       |                              |
| Was UDCA discontinued or was the dose reduced? (Circle, if applicable)                    |                   | DISCONTINUED                                                    | REDUCED                      |
| Reason (e.g. not tolerated) and updated dose: _____                                       |                   |                                                                 |                              |
| <b>Response:</b> If ALP >1.67 ULN, has there been any decrease in ALP? (Circle yes or no) |                   | YES                                                             | NO                           |
| (to be assessed following 1 year of UDCA treatment) Has ALP become <1.67 ULN?             |                   | YES                                                             | NO                           |
| 2. Obeticholic Acid                                                                       | mg/day            |                                                                 |                              |
| 3. Fibrate                                                                                | mg/day            |                                                                 |                              |
| 4. Other (specify)                                                                        |                   |                                                                 |                              |
| <b>Trial participation:</b>                                                               | YES               | NO                                                              | If yes, which drug(s): _____ |
| <b>Symptom management:</b>                                                                |                   |                                                                 |                              |
| Pruitus                                                                                   | YES               | NO                                                              | Fatigue                      |
|                                                                                           |                   |                                                                 | YES                          |
|                                                                                           |                   |                                                                 | NO                           |
| Treatment: _____                                                                          |                   | Treatment: _____                                                |                              |
|                                                                                           |                   | Other (sicca, autonomic dysfunction, sleep difficulties): _____ |                              |
|                                                                                           |                   | Treatment(s): _____                                             |                              |
|                                                                                           |                   |                                                                 |                              |

\*May not apply to all patients. Sicca syndrome = dry/gritty eyes or mouth; Autonomic dysfunction = postural hypotension; Sleep difficulties may include daytime somnolence.

Supported as a service to medicine by Dr Falk Pharma UK Ltd. Date of preparation: April 2020 DrF 20/038

## PBC Review

|                                                                                                                                                                   |     |                                                        |                           |                 |    |
|-------------------------------------------------------------------------------------------------------------------------------------------------------------------|-----|--------------------------------------------------------|---------------------------|-----------------|----|
| <b>Bone density:</b>                                                                                                                                              |     | Hip T-score:                                           |                           | Lumbar T-score: |    |
| Year of last scan:                                                                                                                                                |     | Is the patient osteoporotic?                           |                           | YES             | NO |
|                                                                                                                                                                   |     | If osteoporotic, was appropriate treatment prescribed? |                           | YES             | NO |
| Details:                                                                                                                                                          |     |                                                        |                           |                 |    |
| <b>Date of last elastography:</b>                                                                                                                                 |     |                                                        |                           | <b>Result:</b>  |    |
|                                                                                                                                                                   |     |                                                        |                           |                 |    |
| <b>Is this patient high risk?</b><br>Defined as bilirubin >50 µmol/L OR decreasing albumin OR signs of decompensation (variceal bleed, ascites or encephalopathy) |     |                                                        |                           | YES             | NO |
| Details:                                                                                                                                                          |     |                                                        |                           |                 |    |
| <b>If yes, has transplant been considered?</b>                                                                                                                    |     |                                                        |                           | YES             | NO |
| Details:                                                                                                                                                          |     |                                                        |                           |                 |    |
| <b>Is this patient cirrhotic?</b>                                                                                                                                 | YES | NO                                                     |                           |                 |    |
| <b>Date of last HCC screening:</b>                                                                                                                                |     |                                                        | <b>Date of last OGD:</b>  |                 |    |
| <b>If co-existing Autoimmune Hepatitis, is there a record of diagnostic biopsy?</b>                                                                               |     |                                                        |                           | YES             | NO |
| <b>Year of biopsy:</b>                                                                                                                                            |     |                                                        |                           |                 |    |
| <b>Other concerns:</b>                                                                                                                                            |     |                                                        | <b>Other medications:</b> |                 |    |
|                                                                                                                                                                   |     |                                                        |                           |                 |    |
| <b>Follow up time:</b>                                                                                                                                            |     |                                                        | months                    |                 |    |

Supported as a service to medicine by Dr Falk Pharma UK Ltd.

Date of preparation: April 2020 DrF 20/038



## REFERENCES

## PBC Review

## PBC-10 QUESTIONNAIRE (circle the appropriate answer for all questions 1-10)

| IN THE LAST FOUR WEEKS, how often did you experience any of the following?                                                                                                     |                |          |                            |                  |                   |                |
|--------------------------------------------------------------------------------------------------------------------------------------------------------------------------------|----------------|----------|----------------------------|------------------|-------------------|----------------|
| 1. I have felt embarrassed because of the itching                                                                                                                              | Never          | Rarely   | Sometimes                  | Most of the time | Always            | Not applicable |
| 2. If I eat or drink a small amount, I still feel bloated                                                                                                                      | Never          | Rarely   | Sometimes                  | Most of the time | Always            |                |
| 3. My mouth was very dry                                                                                                                                                       | Never          | Rarely   | Sometimes                  | Most of the time | Always            |                |
| 4. Fatigue interfered with my daily routine                                                                                                                                    | Never          | Rarely   | Sometimes                  | Most of the time | Always            | Not applicable |
| 5. I had to force myself to do the things I needed to do                                                                                                                       | Never          | Rarely   | Sometimes                  | Most of the time | Always            |                |
| 6. If I was busy one day, I needed at least another day to recover                                                                                                             | Never          | Rarely   | Sometimes                  | Most of the time | Always            |                |
| 7. Because of PBC, I found it difficult to concentrate on anything                                                                                                             | Never          | Rarely   | Sometimes                  | Most of the time | Always            |                |
| Now some more general statements about how PBC may be affecting you as a person. How much does the following statement apply to you?                                           |                |          |                            |                  |                   |                |
| 8. I feel guilty that I can't do what I used to be able to do because of having PBC                                                                                            | Not at all     | A little | Somewhat                   | Quite a bit      | Very much         | Not applicable |
| These statements relate to the possible effects of PBC on your social life and your life overall. Thinking of your own situation, how much do you agree or disagree with them? |                |          |                            |                  |                   |                |
| 9. My social life has almost stopped                                                                                                                                           | Strongly agree | Agree    | Neither agree nor disagree | Disagree         | Strongly disagree |                |
| 10. PBC has reduced the quality of my life                                                                                                                                     | Strongly agree | Agree    | Neither agree nor disagree | Disagree         | Strongly disagree |                |

Supported as a service to medicine by Dr Falk Pharma UK Ltd.

Date of preparation: April 2020 DrF 20/038

- 1 Hirschfield GM, Beuers U, Corpechot C, *et al.* EASL Clinical Practice

- Guidelines: The diagnosis and management of patients with primary biliary cholangitis. *J Hepatol* 2017;**67**:145–72. doi:10.1016/j.jhep.2017.03.022
- 2 Komori A, Tanaka A, Takikawa H, *et al.* Guidelines for the management of primary biliary cirrhosis: The Intractable Hepatobiliary Disease Study Group supported by the Ministry of Health, Labour and Welfare of Japan Guidelines for the management of primary biliary cirrhosis: The Intractable Hepatobiliary Disease Study Group supported by the Ministry of Health, Labour and Welfare of Japan. *Hepatol Res* 2014;**44**:71–90. doi:10.1111/hepr.12270
  - 3 Younossi ZM, Stepanova M, Golabi P, *et al.* Factors Associated with Potential Progressive Course of Primary Biliary Cholangitis: Data from Real-world US Database. *J Clin Gastroenterol* 2019;**53**:693–8. doi:10.1097/MCG.0000000000001120
  - 4 Hirschfield GM, Dyson JK, Alexander GJM, *et al.* The British Society of Gastroenterology/UK-PBC primary biliary cholangitis treatment and management guidelines. *Gut* 2018;**0**:1–27. doi:10.1136/gutjnl-2017-315259
  - 5 Van De Meeberg PC, Houwen RHJ, Sinaasappel M, *et al.* Low-dose versus high-dose ursodeoxycholic acid in cystic fibrosis-related cholestatic liver disease. Results of a randomized study with 1-year follow-up. *Scand J Gastroenterol* 1997;**32**:369–73. doi:10.3109/00365529709007686
  - 6 Angulo P, Dickson ER, Therneau TM, *et al.* Comparison of three doses of ursodeoxycholic acid in the treatment of primary biliary cirrhosis: A randomized trial. *J Hepatol* 1999;**30**:830–5. doi:10.1016/S0168-8278(99)80136-6
